# Supplementary material for: Heat Capacities of l-Histidine, l-Phenylalanine, l-Proline, l-Tryptophan and l-Tyrosine
Source: MDPI journal article supplement (doi:10.3390/molecules26144298), 2021-07-15
Supplement: s1 [file s1]

# Supplementary Materials

## Heat capacities of L-histidine, L-phenylalanine, L-proline, L-tryptophan, and L-tyrosine

*Václav Pokorný<sup>a</sup>, Vojtěch Štejfa<sup>a</sup>, Jakub Havlín<sup>b</sup>, Květoslav Růžička<sup>a</sup>, Michal Fulem<sup>a,\*</sup>*

<sup>a</sup> Department of Physical Chemistry, University of Chemistry and Technology, Prague,  
Technická 5, CZ-166 28 Prague 6, Czech Republic

<sup>b</sup> Central Laboratories, University of Chemistry and Technology, Prague, Technická 5, CZ-166  
28 Prague 6, Czech Republic

\*E-mail: fulemm@vscht.cz

Supplementary materials contain:

- 1) DSC thermogram and apparent heat capacity for L-phenylalanine showing the phase transition from I to form Ih.
- 2) Experimental heat capacity data for L-histidine, L-phenylalanine, L-proline, L-tryptophan, and L-tyrosine measured using QuantumDesign PPMS, SETARAM  $\mu$ DSC IIIa and PerkinElmer DSC 8500.
- 3) Tabulated thermodynamic functions (heat capacity, entropy, enthalpy, Gibbs' energy) of L-histidine, L-phenylalanine, L-proline, L-tryptophan, and L-tyrosine.

## 1) DSC thermogram for L-phenylalanine

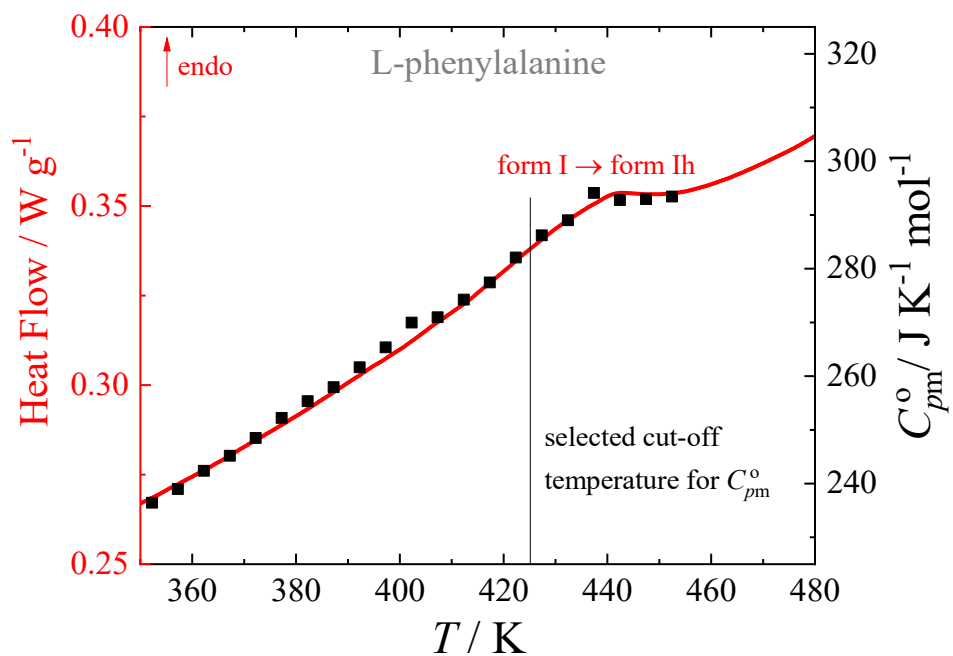

**Figure S1.** DSC thermogram (red line) and apparent high-temperature heat capacities  $C_{pm}^{\circ}$  (black symbols) for L-phenylalanine showing the phase transition form I to form Ih at around 440 K.

## 2) Experimental heat capacity data

**Table S1.** Experimental heat capacity of L-histidine (in J K<sup>-1</sup> mol<sup>-1</sup>) obtained using QuantumDesign PPMS.<sup>a</sup>

| $T / \text{K}$ | $C_{pm}^o$ | $\delta_{\text{rel}}^b / \%$ | $T / \text{K}$ | $C_{pm}^o$ | $\delta_{\text{rel}}^b / \%$ | $T / \text{K}$ | $C_{pm}^o$ | $\delta_{\text{rel}}^b / \%$ |
|----------------|------------|------------------------------|----------------|------------|------------------------------|----------------|------------|------------------------------|
| 303.029        | 181.55     | -0.53                        | 155.950        | 106.41     | -0.02                        | 35.100         | 24.070     | -0.47                        |
| 302.972        | 182.22     | -0.15                        | 155.946        | 106.39     | -0.03                        | 35.100         | 24.068     | -0.48                        |
| 295.787        | 178.80     | 0.09                         | 148.954        | 102.77     | -0.14                        | 30.029         | 18.361     | -0.12                        |
| 295.994        | 178.65     | -0.06                        | 148.968        | 102.80     | -0.11                        | 30.030         | 18.383     | 0.00                         |
| 288.797        | 175.83     | 0.54                         | 141.967        | 99.046     | -0.31                        | 28.075         | 16.037     | -0.65                        |
| 288.978        | 175.61     | 0.36                         | 141.965        | 99.177     | -0.18                        | 28.040         | 16.135     | 0.21                         |
| 281.817        | 172.16     | 0.60                         | 134.968        | 95.375     | -0.39                        | 26.025         | 13.878     | 0.36                         |
| 281.975        | 171.75     | 0.31                         | 134.941        | 95.574     | -0.17                        | 26.027         | 13.883     | 0.38                         |
| 274.832        | 167.81     | 0.25                         | 127.908        | 91.695     | -0.37                        | 24.026         | 11.681     | 0.32                         |
| 274.982        | 167.55     | 0.04                         | 127.845        | 91.922     | -0.09                        | 24.020         | 11.681     | 0.38                         |
| 267.841        | 163.52     | -0.09                        | 120.922        | 87.990     | -0.34                        | 21.996         | 9.6109     | 0.81                         |
| 267.991        | 163.58     | -0.10                        | 120.841        | 88.248     | 0.00                         | 21.998         | 9.6097     | 0.77                         |
| 260.856        | 159.78     | -0.10                        | 113.927        | 84.099     | -0.40                        | 19.950         | 7.6217     | 0.83                         |
| 260.994        | 159.58     | -0.27                        | 113.846        | 84.254     | -0.17                        | 19.955         | 7.6293     | 0.87                         |
| 253.858        | 156.03     | -0.13                        | 106.916        | 80.264     | -0.25                        | 17.978         | 5.8339     | 0.12                         |
| 254.000        | 155.91     | -0.25                        | 106.858        | 80.378     | -0.06                        | 17.978         | 5.8057     | -0.37                        |
| 246.872        | 152.47     | -0.04                        | 100.888        | 76.905     | -0.04                        | 15.926         | 4.2070     | -0.21                        |
| 246.998        | 152.28     | -0.21                        | 100.832        | 76.975     | 0.10                         | 15.957         | 4.2118     | -0.63                        |
| 239.871        | 148.93     | 0.05                         | 95.843         | 74.115     | 0.31                         | 13.911         | 2.8285     | -0.93                        |
| 239.989        | 148.77     | -0.10                        | 95.789         | 74.232     | 0.51                         | 13.913         | 2.8291     | -0.95                        |
| 232.871        | 145.38     | 0.13                         | 90.790         | 71.212     | 0.67                         | 11.903         | 1.7498     | -0.66                        |
| 232.985        | 145.29     | 0.02                         | 90.742         | 71.262     | 0.78                         | 11.901         | 1.7540     | -0.37                        |
| 225.884        | 141.87     | 0.21                         | 85.729         | 67.870     | 0.59                         | 9.887          | 0.96960    | 0.76                         |
| 225.987        | 141.73     | 0.08                         | 85.681         | 67.986     | 0.81                         | 9.894          | 0.96914    | 0.48                         |
| 218.894        | 138.29     | 0.24                         | 80.665         | 64.210     | 0.23                         | 7.859          | 0.45910    | 0.75                         |
| 218.988        | 138.25     | 0.17                         | 80.613         | 64.285     | 0.41                         | 7.866          | 0.45913    | 0.47                         |
| 211.900        | 134.58     | 0.15                         | 75.655         | 60.363     | -0.28                        | 6.339          | 0.23037    | -0.17                        |
| 211.991        | 134.36     | -0.05                        | 75.602         | 60.426     | -0.11                        | 6.290          | 0.22714    | 0.83                         |
| 204.911        | 130.87     | 0.03                         | 70.597         | 56.542     | -0.45                        | 5.242          | 0.12791    | -0.56                        |
| 204.994        | 130.73     | -0.11                        | 70.550         | 56.575     | -0.33                        | 5.242          | 0.12772    | -0.70                        |
| 197.921        | 127.28     | -0.03                        | 65.538         | 52.610     | -0.50                        | 4.362          | 0.07359    | -0.42                        |
| 197.993        | 127.19     | -0.12                        | 65.497         | 52.646     | -0.37                        | 4.361          | 0.07360    | -0.34                        |
| 190.931        | 123.89     | 0.06                         | 60.491         | 48.652     | -0.19                        | 3.679          | 0.04390    | -0.80                        |
| 190.992        | 123.82     | -0.02                        | 60.463         | 48.540     | -0.38                        | 3.679          | 0.04388    | -0.85                        |
| 183.937        | 120.46     | 0.10                         | 55.351         | 44.335     | 0.04                         | 3.086          | 0.02586    | -0.33                        |
| 183.989        | 120.45     | 0.07                         | 55.359         | 44.325     | 0.00                         | 3.086          | 0.02584    | -0.38                        |
| 176.938        | 117.06     | 0.17                         | 50.284         | 39.762     | 0.09                         | 2.609          | 0.01571    | 1.43                         |
| 176.985        | 117.08     | 0.16                         | 50.284         | 39.768     | 0.11                         | 2.609          | 0.01573    | 1.55                         |
| 169.942        | 113.65     | 0.22                         | 45.229         | 34.893     | -0.02                        | 2.222          | 0.00958    | 1.67                         |
| 169.981        | 113.64     | 0.20                         | 45.228         | 34.901     | 0.01                         | 2.222          | 0.00958    | 1.62                         |
| 162.946        | 110.05     | 0.12                         | 40.169         | 29.625     | -0.36                        | 1.913          | 0.00580    | -1.97                        |
| 162.966        | 110.02     | 0.08                         | 40.169         | 29.628     | -0.35                        | 1.912          | 0.00582    | -1.40                        |

<sup>a</sup> Standard uncertainty of temperature is  $u(T)=0.004$  K, and the combined expanded uncertainty of heat capacity  $U_c(C_{pm})$  with 0.95 level of confidence ( $k=2$ ) is:  $U_c(C_{pm})=0.1 C_{pm}$  below 10 K;  $U_c(C_{pm})=0.03 C_{pm}$  in temperature range (10 to 40) K;  $U_c(C_{pm})=0.02 C_{pm}$  in temperature range (40 to 300) K. Values are reported with more digits than is justified by the experimental uncertainty to avoid round-off errors in calculations based on these results. Measurements are performed in vacuum (residual pressure  $p<10^{-4}$  Pa).

<sup>b</sup>  $\delta_{\text{rel}}$  is the percentage deviation of experimental heat capacity data from the smoothed values from Equations (1) and (2) using parameters listed in Table 5.

**Table S2.** Experimental heat capacity of L-histidine (in J K<sup>-1</sup> mol<sup>-1</sup>) at  $p = (100 \pm 5)$  kPa obtained using SETARAM  $\mu$ DSC IIIa and PerkinElmer DSC 8500.

| SETARAM $\mu$ DSC IIIa <sup>a</sup> |            |                              | PerkinElmer DSC 8500 <sup>b</sup> |            |                              |
|-------------------------------------|------------|------------------------------|-----------------------------------|------------|------------------------------|
| $m = 384.18$ mg                     |            |                              | $m = 21.78$ mg, $SF = 0.976$      |            |                              |
| $T / \text{K}$                      | $C_{pm}^o$ | $\delta_{\text{rel}}^c / \%$ | $T / \text{K}$                    | $C_{pm}^o$ | $\delta_{\text{rel}}^c / \%$ |
| 266.95                              | 163.04     | -0.09                        | 307.32                            | 184.64     | -0.10                        |
| 270.00                              | 165.16     | 0.21                         | 312.30                            | 187.47     | -0.01                        |
| 275.00                              | 167.72     | 0.14                         | 317.29                            | 190.18     | 0.01                         |
| 280.00                              | 170.04     | -0.07                        | 322.27                            | 192.51     | -0.15                        |
| 285.00                              | 172.45     | -0.23                        | 327.26                            | 195.31     | -0.07                        |
| 290.00                              | 175.09     | -0.25                        | 332.25                            | 197.80     | -0.15                        |
| 295.00                              | 177.85     | -0.21                        | 337.24                            | 200.56     | -0.08                        |
| 300.00                              | 180.47     | -0.24                        | 342.24                            | 203.17     | -0.08                        |
| 305.00                              | 183.23     | -0.19                        | 347.24                            | 205.90     | -0.02                        |
| 310.00                              | 185.98     | -0.15                        | 352.24                            | 208.63     | 0.06                         |
| 315.00                              | 188.81     | -0.06                        | 357.24                            | 210.91     | -0.08                        |
| 320.00                              | 191.57     | -0.01                        | 362.24                            | 213.39     | -0.11                        |
| 325.00                              | 194.23     | -0.01                        | 367.24                            | 215.95     | -0.09                        |
| 330.00                              | 196.91     | 0.01                         | 372.24                            | 218.80     | 0.07                         |
| 335.00                              | 199.60     | 0.03                         | 377.24                            | 221.56     | 0.20                         |
| 340.00                              | 202.28     | 0.06                         | 382.25                            | 224.07     | 0.23                         |
| 345.00                              | 204.94     | 0.08                         | 387.26                            | 226.41     | 0.20                         |
| 350.00                              | 207.66     | 0.15                         | 392.26                            | 229.05     | 0.31                         |
| 353.20                              | 209.38     | 0.18                         | 397.27                            | 231.19     | 0.22                         |
|                                     |            |                              | 402.29                            | 232.82     | -0.08                        |
|                                     |            |                              | 407.30                            | 234.72     | -0.23                        |
|                                     |            |                              | 412.32                            | 237.26     | -0.10                        |
|                                     |            |                              | 417.33                            | 239.52     | -0.07                        |
|                                     |            |                              | 422.35                            | 241.60     | -0.10                        |
|                                     |            |                              | 427.37                            | 243.72     | -0.09                        |
|                                     |            |                              | 432.39                            | 245.72     | -0.11                        |
|                                     |            |                              | 437.41                            | 248.30     | 0.12                         |

<sup>a</sup> Standard uncertainty of temperature is  $u(T) = 0.05$  K, and the combined expanded uncertainty of the heat capacity is  $U_c(C_{pm}^o) = 0.01 C_{pm}^o$  (0.95 level of confidence).

<sup>b</sup> Standard uncertainty of temperature is  $u(T) = 0.1$  K, and the combined expanded uncertainty of the heat capacity is  $U_c(C_{pm}^o) = 0.03 C_{pm}^o$  (0.95 level of confidence). The raw experimental data were scaled by the *ad hoc* selected  $SF$  value to obtain superior agreement with the more accurate SETARAM  $\mu$ DSC IIIa results.

<sup>c</sup>  $\delta_{\text{rel}}$  is the percentage deviation of experimental heat capacity data from the smoothed values from Equations (1) and (2) using parameters listed in Table 5.

**Table S3.** Experimental heat capacity of L-phenylalanine (in J K<sup>-1</sup> mol<sup>-1</sup>) at  $p = (100 \pm 5)$  kPa.

| SETARAM $\mu$ DSC IIIa <sup>a</sup> |            |                              | PerkinElmer DSC 8500 <sup>b</sup> |            |                              |
|-------------------------------------|------------|------------------------------|-----------------------------------|------------|------------------------------|
| $m = 472.14$ mg                     |            |                              | $m = 16.98$ mg, $SF = 0.993$      |            |                              |
| $T / \text{K}$                      | $C_{pm}^o$ | $\delta_{\text{rel}}^c / \%$ | $T / \text{K}$                    | $C_{pm}^o$ | $\delta_{\text{rel}}^c / \%$ |
| 262.19                              | 178.54     | -0.19                        | 307.32                            | 207.47     | -0.07                        |
| 265.00                              | 180.61     | -0.03                        | 312.30                            | 210.64     | -0.08                        |
| 270.00                              | 183.94     | 0.07                         | 317.29                            | 214.29     | 0.13                         |
| 275.00                              | 187.15     | 0.09                         | 322.27                            | 217.02     | -0.09                        |
| 280.00                              | 190.24     | 0.04                         | 327.26                            | 220.58     | 0.07                         |
| 285.00                              | 193.23     | -0.06                        | 332.25                            | 223.36     | -0.12                        |
| 290.00                              | 196.29     | -0.12                        | 337.24                            | 226.24     | -0.26                        |
| 295.00                              | 199.61     | -0.06                        | 342.24                            | 229.56     | -0.21                        |
| 300.00                              | 202.91     | 0.00                         | 347.24                            | 233.13     | -0.05                        |
| 305.00                              | 206.16     | 0.02                         | 352.24                            | 236.43     | -0.01                        |
| 310.00                              | 209.34     | 0.01                         | 357.24                            | 238.99     | -0.28                        |
| 315.00                              | 212.65     | 0.05                         | 362.24                            | 242.37     | -0.19                        |
| 320.00                              | 215.85     | 0.04                         | 367.24                            | 245.17     | -0.35                        |
| 325.00                              | 219.02     | 0.02                         | 372.24                            | 248.48     | -0.29                        |
| 330.00                              | 222.11     | -0.03                        | 377.24                            | 252.23     | -0.06                        |
| 335.00                              | 225.15     | -0.11                        | 382.25                            | 255.34     | -0.07                        |
| 340.00                              | 228.10     | -0.22                        | 387.26                            | 257.92     | -0.29                        |
| 345.00                              | 231.44     | -0.16                        | 392.26                            | 261.65     | -0.06                        |
| 350.00                              | 234.93     | -0.04                        | 397.27                            | 265.34     | 0.16                         |
| 355.00                              | 237.99     | -0.10                        | 402.29                            | 269.97     | 0.73                         |
| 358.02                              | 239.77     | -0.16                        | 407.30                            | 270.96     | -0.06                        |
|                                     |            |                              | 412.32                            | 274.24     | 0.02                         |
|                                     |            |                              | 417.33                            | 277.43     | 0.08                         |
|                                     |            |                              | 422.35                            | 282.08     | 0.65                         |

<sup>a</sup> Standard uncertainty of temperature is  $u(T) = 0.05$  K, and the combined expanded uncertainty of the heat capacity is  $U_c(C_{pm}^o) = 0.01 C_{pm}^o$  (0.95 level of confidence).

<sup>b</sup> Standard uncertainty of temperature is  $u(T) = 0.1$  K, and the combined expanded uncertainty of the heat capacity is  $U_c(C_{pm}^o) = 0.03 C_{pm}^o$  (0.95 level of confidence). The raw experimental data were scaled by the *ad hoc* selected  $SF$  value to obtain superior agreement with the more accurate SETARAM  $\mu$ DSC IIIa results.

<sup>c</sup>  $\delta_{\text{rel}}$  is the percentage deviation of experimental heat capacity data from the smoothed values from Equations (1) and (2) using parameters listed in Table 5.

**Table S4.** Experimental heat capacity of L-proline (in J K<sup>-1</sup> mol<sup>-1</sup>) at  $p = (100 \pm 5)$  kPa.

| SETARAM $\mu$ DSC IIIa <sup>a</sup> |                  |                                       | PerkinElmer DSC 8500 <sup>b</sup> |                  |                                       |
|-------------------------------------|------------------|---------------------------------------|-----------------------------------|------------------|---------------------------------------|
| $m = 429.09$ mg                     |                  |                                       | $m = 14.71$ mg, $SF = 1.017$      |                  |                                       |
| $T / \text{K}$                      | $C_{pm}^{\circ}$ | $\delta_{\text{rel}}^{\text{c}} / \%$ | $T / \text{K}$                    | $C_{pm}^{\circ}$ | $\delta_{\text{rel}}^{\text{c}} / \%$ |
| 262.31                              | 133.42           | -0.54                                 | 305.83                            | 152.06           | -1.02                                 |
| 265.00                              | 134.85           | -0.35                                 | 310.84                            | 155.01           | -0.61                                 |
| 270.00                              | 137.20           | -0.23                                 | 315.84                            | 157.30           | -0.64                                 |
| 275.00                              | 139.44           | -0.19                                 | 320.85                            | 159.97           | -0.45                                 |
| 280.00                              | 141.54           | -0.27                                 | 325.85                            | 162.37           | -0.45                                 |
| 285.00                              | 143.61           | -0.37                                 | 330.85                            | 166.05           | 0.32                                  |
| 290.00                              | 145.80           | -0.40                                 | 335.85                            | 168.35           | 0.22                                  |
| 295.00                              | 148.19           | -0.31                                 | 340.86                            | 171.20           | 0.41                                  |
| 300.00                              | 150.69           | -0.16                                 | 345.87                            | 173.36           | 0.19                                  |
| 305.00                              | 153.08           | -0.10                                 | 350.87                            | 175.78           | 0.11                                  |
| 310.00                              | 155.44           | -0.08                                 | 355.88                            | 178.33           | 0.08                                  |
| 315.00                              | 157.85           | -0.04                                 | 360.89                            | 181.05           | 0.13                                  |
| 320.00                              | 160.26           | -0.01                                 | 365.89                            | 183.78           | 0.20                                  |
| 325.00                              | 162.67           | -0.01                                 | 370.90                            | 186.23           | 0.11                                  |
| 330.00                              | 164.94           | -0.10                                 | 375.90                            | 188.89           | 0.15                                  |
| 335.00                              | 167.25           | -0.19                                 | 380.89                            | 191.29           | 0.09                                  |
| 340.00                              | 169.58           | -0.28                                 | 385.89                            | 193.82           | 0.12                                  |
| 345.00                              | 172.02           | -0.32                                 | 390.90                            | 196.27           | 0.14                                  |
| 350.00                              | 174.88           | -0.15                                 | 395.90                            | 198.36           | 0.04                                  |
| 355.00                              | 177.50           | -0.13                                 | 400.87                            | 200.22           | -0.12                                 |
| 358.02                              | 178.99           | -0.18                                 | 405.87                            | 202.21           | -0.16                                 |
|                                     |                  |                                       | 410.91                            | 204.22           | -0.12                                 |
|                                     |                  |                                       | 415.92                            | 206.21           | 0.00                                  |
|                                     |                  |                                       | 420.93                            | 207.71           | -0.04                                 |
|                                     |                  |                                       | 425.93                            | 209.00           | -0.10                                 |
|                                     |                  |                                       | 430.92                            | 210.53           | 0.07                                  |
|                                     |                  |                                       | 435.92                            | 211.57           | 0.10                                  |

<sup>a</sup> Standard uncertainty of temperature is  $u(T) = 0.05$  K, and the combined expanded uncertainty of the heat capacity is  $U_c(C_{pm}^{\circ}) = 0.01 C_{pm}^{\circ}$  (0.95 level of confidence).

<sup>b</sup> Standard uncertainty of temperature is  $u(T) = 0.1$  K, and the combined expanded uncertainty of the heat capacity is  $U_c(C_{pm}^{\circ}) = 0.03 C_{pm}^{\circ}$  (0.95 level of confidence). The raw experimental data were scaled by the *ad hoc* selected  $SF$  value to obtain superior agreement with the more accurate SETARAM  $\mu$ DSC IIIa results.

<sup>c</sup>  $\delta_{\text{rel}}$  is the percentage deviation of experimental heat capacity data from the smoothed values from Equations (1) and (2) using parameters listed in Table 5.

**Table S5:** Experimental heat capacity of L-tryptophan (in J K<sup>-1</sup> mol<sup>-1</sup>) at  $p = (100 \pm 5)$  kPa.

| SETARAM $\mu$ DSC IIIa <sup>a</sup> |            |                      | PerkinElmer DSC 8500 <sup>b</sup> |            |                      |
|-------------------------------------|------------|----------------------|-----------------------------------|------------|----------------------|
| $m = 391.53$ mg                     |            |                      | $m = 20.84$ mg, $SF = 1.004$      |            |                      |
| $T$ / K                             | $C_{pm}^o$ | $\delta_{rel}^c$ / % | $T$ / K                           | $C_{pm}^o$ | $\delta_{rel}^c$ / % |
| 266.17                              | 212.12     | -0.49                | 307.32                            | 244.49     | -0.03                |
| 270.00                              | 215.82     | -0.12                | 312.30                            | 248.21     | -0.05                |
| 275.00                              | 220.25     | 0.16                 | 317.29                            | 252.45     | 0.14                 |
| 280.00                              | 224.13     | 0.18                 | 322.27                            | 255.65     | -0.08                |
| 285.00                              | 227.94     | 0.18                 | 327.26                            | 259.51     | -0.03                |
| 290.00                              | 231.68     | 0.14                 | 332.25                            | 262.66     | -0.25                |
| 295.00                              | 235.29     | 0.05                 | 337.24                            | 266.43     | -0.22                |
| 300.00                              | 238.90     | -0.04                | 342.24                            | 270.06     | -0.24                |
| 305.00                              | 242.56     | -0.10                | 347.24                            | 274.26     | -0.04                |
| 310.00                              | 246.24     | -0.14                | 352.24                            | 278.08     | 0.02                 |
| 315.00                              | 249.99     | -0.15                | 357.24                            | 280.87     | -0.27                |
| 320.00                              | 253.69     | -0.18                | 362.24                            | 284.69     | -0.18                |
| 325.00                              | 257.49     | -0.16                | 367.24                            | 287.70     | -0.36                |
| 330.00                              | 261.25     | -0.15                | 372.24                            | 291.84     | -0.14                |
| 335.00                              | 265.18     | -0.07                | 377.24                            | 296.28     | 0.19                 |
| 340.00                              | 269.01     | -0.02                | 382.25                            | 300.57     | 0.48                 |
| 345.00                              | 272.68     | -0.02                | 387.26                            | 303.84     | 0.44                 |
| 350.00                              | 276.52     | 0.05                 | 392.26                            | 307.12     | 0.42                 |
| 353.33                              | 279.12     | 0.11                 | 397.27                            | 309.98     | 0.28                 |
|                                     |            |                      | 402.29                            | 313.85     | 0.48                 |
|                                     |            |                      | 407.30                            | 314.44     | -0.35                |
|                                     |            |                      | 412.32                            | 318.14     | -0.16                |
|                                     |            |                      | 417.33                            | 321.83     | 0.04                 |
|                                     |            |                      | 422.35                            | 324.91     | 0.06                 |
|                                     |            |                      | 427.37                            | 325.66     | -0.60                |
|                                     |            |                      | 432.39                            | 330.12     | -0.11                |
|                                     |            |                      | 437.41                            | 333.96     | 0.20                 |

<sup>a</sup> Standard uncertainty of temperature is  $u(T) = 0.05$  K, and the combined expanded uncertainty of the heat capacity is  $U_c(C_{pm}^o) = 0.01 C_{pm}^o$  (0.95 level of confidence).

<sup>b</sup> Standard uncertainty of temperature is  $u(T) = 0.1$  K, and the combined expanded uncertainty of the heat capacity is  $U_c(C_{pm}^o) = 0.03 C_{pm}^o$  (0.95 level of confidence). The raw experimental data were scaled by the *ad hoc* selected  $SF$  value to obtain superior agreement with the more accurate SETARAM  $\mu$ DSC IIIa results.

<sup>c</sup>  $\delta_{rel}$  is the percentage deviation of experimental heat capacity data from the smoothed values from Equations (1) and (2) using parameters listed in Table 5

**Table S6:** Experimental heat capacity of L-tyrosine (in J K<sup>-1</sup> mol<sup>-1</sup>) at  $p = (100 \pm 5)$  kPa

| SETARAM $\mu$ DSC IIIa <sup>a</sup> |                  |                                       | PerkinElmer DSC 8500 <sup>b</sup> |                  |                                       |
|-------------------------------------|------------------|---------------------------------------|-----------------------------------|------------------|---------------------------------------|
| $m = 410.88$ mg                     |                  |                                       | $m = 21.38$ mg, $SF = 1.001$      |                  |                                       |
| $T / \text{K}$                      | $C_{pm}^{\circ}$ | $\delta_{\text{rel}}^{\text{c}} / \%$ | $T / \text{K}$                    | $C_{pm}^{\circ}$ | $\delta_{\text{rel}}^{\text{c}} / \%$ |
| 265.89                              | 192.37           | -0.54                                 | 307.32                            | 221.18           | -0.28                                 |
| 270.00                              | 195.91           | -0.16                                 | 312.30                            | 224.63           | -0.28                                 |
| 275.00                              | 199.93           | 0.16                                  | 317.29                            | 228.63           | -0.04                                 |
| 280.00                              | 203.43           | 0.20                                  | 322.27                            | 231.71           | -0.21                                 |
| 285.00                              | 206.78           | 0.16                                  | 327.26                            | 235.05           | -0.27                                 |
| 290.00                              | 210.10           | 0.11                                  | 332.25                            | 238.86           | -0.14                                 |
| 295.00                              | 213.33           | 0.01                                  | 337.24                            | 242.45           | -0.10                                 |
| 300.00                              | 216.59           | -0.07                                 | 342.24                            | 246.33           | 0.05                                  |
| 305.00                              | 219.86           | -0.15                                 | 347.24                            | 249.98           | 0.10                                  |
| 310.00                              | 223.22           | -0.20                                 | 352.24                            | 253.51           | 0.09                                  |
| 315.00                              | 226.64           | -0.21                                 | 357.24                            | 256.41           | -0.16                                 |
| 320.00                              | 230.11           | -0.22                                 | 362.24                            | 260.18           | -0.08                                 |
| 325.00                              | 233.60           | -0.21                                 | 367.24                            | 263.47           | -0.18                                 |
| 330.00                              | 237.11           | -0.21                                 | 372.24                            | 266.93           | -0.22                                 |
| 335.00                              | 240.76           | -0.14                                 | 377.24                            | 271.11           | 0.00                                  |
| 340.00                              | 244.37           | -0.10                                 | 382.25                            | 274.23           | -0.17                                 |
| 345.00                              | 248.03           | -0.05                                 | 387.26                            | 277.80           | -0.18                                 |
| 350.00                              | 251.79           | 0.04                                  | 392.26                            | 282.15           | 0.09                                  |
| 353.36                              | 254.45           | 0.15                                  | 397.27                            | 285.81           | 0.10                                  |
|                                     |                  |                                       | 402.29                            | 290.30           | 0.40                                  |
|                                     |                  |                                       | 407.30                            | 292.69           | -0.03                                 |
|                                     |                  |                                       | 412.32                            | 296.35           | -0.02                                 |
|                                     |                  |                                       | 417.33                            | 300.57           | 0.17                                  |
|                                     |                  |                                       | 422.35                            | 304.36           | 0.22                                  |
|                                     |                  |                                       | 427.37                            | 308.32           | 0.32                                  |
|                                     |                  |                                       | 432.39                            | 310.49           | -0.16                                 |
|                                     |                  |                                       | 437.41                            | 313.61           | -0.33                                 |

<sup>a</sup> Standard uncertainty of temperature is  $u(T) = 0.05$  K, and the combined expanded uncertainty of the heat capacity is  $U_c(C_{pm}^{\circ}) = 0.01 C_{pm}^{\circ}$  (0.95 level of confidence).

<sup>b</sup> Standard uncertainty of temperature is  $u(T) = 0.1$  K, and the combined expanded uncertainty of the heat capacity is  $U_c(C_{pm}^{\circ}) = 0.03 C_{pm}^{\circ}$  (0.95 level of confidence). The raw experimental data were scaled by the *ad hoc* selected  $SF$  value to obtain superior agreement with the more accurate SETARAM  $\mu$ DSC IIIa results.

<sup>c</sup>  $\delta_{\text{rel}}$  is the percentage deviation of experimental heat capacity data from the smoothed values from Equations (1) and (2) using parameters listed in Table 5



### 3) Tabulated thermodynamic functions

Standard thermodynamic functions were calculated using fundamental thermodynamic relationships (assuming residual entropy at 0 K for all crystalline amino acids to be  $0 \text{ J}\cdot\text{K}^{-1}\cdot\text{mol}^{-1}$ ) and heat capacities  $C_{pm}^{\circ}(T)$  represented by Equations (1) and (2) using parameters listed in Table 5:

$$S_m^{\circ}(T) = \int_0^T \frac{C_{pm}^{\circ}(T)}{T} dT \quad (\text{S1})$$

$$\Delta_0^T H_m^{\circ} = \int_0^T C_{pm}^{\circ}(T) dT \quad (\text{S2})$$

$$\Delta_0^T G_m^{\circ} = \Delta_0^T H_m^{\circ} - TS_m^{\circ}(T) \quad (\text{S3})$$

**Table S7.** Standard thermodynamic functions of L-histidine in the crystal state<sup>a</sup> at  $p = 0.1$  MPa.<sup>b</sup>

| $T / \text{K}$ | $C_{pm}^{\circ} / \text{J} \cdot \text{K}^{-1} \cdot \text{mol}^{-1}$ | $S_{\text{m}}^{\circ} / \text{J} \cdot \text{K}^{-1} \cdot \text{mol}^{-1}$ | $\Delta_0^T H_{\text{m}}^{\circ} / \text{kJ} \cdot \text{mol}^{-1}$ | $\Delta_0^T G_{\text{m}}^{\circ} / \text{kJ} \cdot \text{mol}^{-1}$ |
|----------------|-----------------------------------------------------------------------|-----------------------------------------------------------------------------|---------------------------------------------------------------------|---------------------------------------------------------------------|
| 1 <sup>c</sup> | 7.816E-04                                                             | 2.527E-04                                                                   | 1.908E-07                                                           | -6.194E-08                                                          |
| 2              | 6.793E-03                                                             | 2.179E-03                                                                   | 3.299E-06                                                           | -1.060E-06                                                          |
| 3              | 2.379E-02                                                             | 7.688E-03                                                                   | 1.745E-05                                                           | -5.616E-06                                                          |
| 4              | 5.695E-02                                                             | 1.863E-02                                                                   | 5.628E-05                                                           | -1.825E-05                                                          |
| 5              | 1.115E-01                                                             | 3.674E-02                                                                   | 1.384E-04                                                           | -4.527E-05                                                          |
| 6              | 1.946E-01                                                             | 6.391E-02                                                                   | 2.887E-04                                                           | -9.475E-05                                                          |
| 7              | 3.151E-01                                                             | 1.024E-01                                                                   | 5.400E-04                                                           | -1.769E-04                                                          |
| 8              | 4.825E-01                                                             | 1.548E-01                                                                   | 9.345E-04                                                           | -3.042E-04                                                          |
| 9              | 7.072E-01                                                             | 2.240E-01                                                                   | 1.524E-03                                                           | -4.921E-04                                                          |
| 10             | 9.988E-01                                                             | 3.130E-01                                                                   | 2.371E-03                                                           | -7.589E-04                                                          |
| 11             | 1.365                                                                 | 4.248E-01                                                                   | 3.547E-03                                                           | -1.126E-03                                                          |
| 12             | 1.808                                                                 | 5.620E-01                                                                   | 5.127E-03                                                           | -1.617E-03                                                          |
| 13             | 2.324                                                                 | 7.266E-01                                                                   | 7.187E-03                                                           | -2.259E-03                                                          |
| 14             | 2.910                                                                 | 9.198E-01                                                                   | 9.798E-03                                                           | -3.080E-03                                                          |
| 15             | 3.560                                                                 | 1.142                                                                       | 1.303E-02                                                           | -4.108E-03                                                          |
| 16             | 4.270                                                                 | 1.395                                                                       | 1.694E-02                                                           | -5.374E-03                                                          |
| 17             | 5.033                                                                 | 1.676                                                                       | 2.159E-02                                                           | -6.907E-03                                                          |
| 18             | 5.845                                                                 | 1.987                                                                       | 2.702E-02                                                           | -8.736E-03                                                          |
| 19             | 6.703                                                                 | 2.325                                                                       | 3.329E-02                                                           | -1.089E-02                                                          |
| 20             | 7.605                                                                 | 2.692                                                                       | 4.044E-02                                                           | -1.340E-02                                                          |
| 25             | 12.70                                                                 | 4.920                                                                       | 9.085E-02                                                           | -3.216E-02                                                          |
| 30             | 18.35                                                                 | 7.730                                                                       | 1.683E-01                                                           | -6.357E-02                                                          |
| 35             | 24.07                                                                 | 10.99                                                                       | 2.744E-01                                                           | -1.102E-01                                                          |
| 40             | 29.55                                                                 | 14.57                                                                       | 4.086E-01                                                           | -1.740E-01                                                          |
| 45             | 34.67                                                                 | 18.35                                                                       | 5.694E-01                                                           | -2.562E-01                                                          |
| 50             | 39.46                                                                 | 22.25                                                                       | 7.548E-01                                                           | -3.577E-01                                                          |
| 55             | 44.01                                                                 | 26.23                                                                       | 9.636E-01                                                           | -4.788E-01                                                          |
| 60             | 48.33                                                                 | 30.24                                                                       | 1.195                                                               | -6.200E-01                                                          |
| 65             | 52.44                                                                 | 34.27                                                                       | 1.447                                                               | -7.813E-01                                                          |
| 70             | 56.35                                                                 | 38.31                                                                       | 1.719                                                               | -9.627E-01                                                          |
| 75             | 60.06                                                                 | 42.32                                                                       | 2.010                                                               | -1.164                                                              |
| 80             | 63.60                                                                 | 46.31                                                                       | 2.319                                                               | -1.386                                                              |
| 85             | 66.99                                                                 | 50.27                                                                       | 2.646                                                               | -1.627                                                              |
| 90             | 70.24                                                                 | 54.19                                                                       | 2.989                                                               | -1.889                                                              |
| 95             | 73.37                                                                 | 58.07                                                                       | 3.348                                                               | -2.169                                                              |
| 100            | 76.40                                                                 | 61.91                                                                       | 3.722                                                               | -2.469                                                              |
| 110            | 82.23                                                                 | 69.47                                                                       | 4.516                                                               | -3.126                                                              |
| 120            | 87.79                                                                 | 76.87                                                                       | 5.366                                                               | -3.858                                                              |
| 130            | 93.15                                                                 | 84.10                                                                       | 6.271                                                               | -4.663                                                              |
| 140            | 98.35                                                                 | 91.20                                                                       | 7.228                                                               | -5.540                                                              |
| 150            | 103.4                                                                 | 98.16                                                                       | 8.237                                                               | -6.487                                                              |
| 160            | 108.5                                                                 | 105.0                                                                       | 9.297                                                               | -7.502                                                              |
| 170            | 113.4                                                                 | 111.7                                                                       | 10.41                                                               | -8.586                                                              |
| 180            | 118.4                                                                 | 118.3                                                                       | 11.57                                                               | -9.736                                                              |
| 190            | 123.4                                                                 | 124.9                                                                       | 12.77                                                               | -10.95                                                              |
| 200            | 128.4                                                                 | 131.3                                                                       | 14.03                                                               | -12.23                                                              |
| 210            | 133.4                                                                 | 137.7                                                                       | 15.34                                                               | -13.58                                                              |

| $T / \text{K}$ | $C_{pm}^{\circ} / \text{J} \cdot \text{K}^{-1} \cdot \text{mol}^{-1}$ | $S_{\text{m}}^{\circ} / \text{J} \cdot \text{K}^{-1} \cdot \text{mol}^{-1}$ | $\Delta_0^T H_{\text{m}}^{\circ} / \text{kJ} \cdot \text{mol}^{-1}$ | $\Delta_0^T G_{\text{m}}^{\circ} / \text{kJ} \cdot \text{mol}^{-1}$ |
|----------------|-----------------------------------------------------------------------|-----------------------------------------------------------------------------|---------------------------------------------------------------------|---------------------------------------------------------------------|
| 220            | 138.5                                                                 | 144.0                                                                       | 16.70                                                               | -14.99                                                              |
| 230            | 143.7                                                                 | 150.3                                                                       | 18.11                                                               | -16.46                                                              |
| 240            | 148.9                                                                 | 156.5                                                                       | 19.58                                                               | -17.99                                                              |
| 250            | 154.2                                                                 | 162.7                                                                       | 21.09                                                               | -19.59                                                              |
| 260            | 159.5                                                                 | 168.9                                                                       | 22.66                                                               | -21.25                                                              |
| 270            | 164.8                                                                 | 175.0                                                                       | 24.28                                                               | -22.97                                                              |
| 273.15         | 166.5                                                                 | 176.9                                                                       | 24.80                                                               | -23.52                                                              |
| 280            | 170.2                                                                 | 181.1                                                                       | 25.96                                                               | -24.75                                                              |
| 290            | 175.5                                                                 | 187.2                                                                       | 27.68                                                               | -26.59                                                              |
| 298.15         | 179.9                                                                 | 192.1                                                                       | 29.13                                                               | -28.13                                                              |
| 300            | 180.9                                                                 | 193.2                                                                       | 29.47                                                               | -28.49                                                              |
| 310            | 186.3                                                                 | 199.2                                                                       | 31.30                                                               | -30.45                                                              |
| 320            | 191.6                                                                 | 205.2                                                                       | 33.19                                                               | -32.48                                                              |
| 330            | 196.9                                                                 | 211.2                                                                       | 35.13                                                               | -34.56                                                              |
| 340            | 202.2                                                                 | 217.1                                                                       | 37.13                                                               | -36.70                                                              |
| 350            | 207.4                                                                 | 223.1                                                                       | 39.18                                                               | -38.90                                                              |
| 360            | 212.5                                                                 | 229.0                                                                       | 41.28                                                               | -41.16                                                              |
| 370            | 217.5                                                                 | 234.9                                                                       | 43.43                                                               | -43.48                                                              |
| 380            | 222.5                                                                 | 240.8                                                                       | 45.63                                                               | -45.86                                                              |
| 390            | 227.3                                                                 | 246.6                                                                       | 47.88                                                               | -48.29                                                              |
| 400            | 232.0                                                                 | 252.4                                                                       | 50.17                                                               | -50.79                                                              |
| 410            | 236.5                                                                 | 258.2                                                                       | 52.51                                                               | -53.34                                                              |
| 420            | 240.8                                                                 | 263.9                                                                       | 54.90                                                               | -55.95                                                              |
| 430            | 245.0                                                                 | 269.7                                                                       | 57.33                                                               | -58.62                                                              |

<sup>a</sup> Crystal structure deposited in the Cambridge Structural Database with refcode LHISTD10 (see the section 3.2 and Table 3 in the main article).

<sup>b</sup> The combined expanded uncertainty of heat capacity  $U_c(C_{pm})$  as well as of all calculated thermodynamic values (with 0.95 level of confidence,  $k=2$ ) is:  $U_c(X)=0.1 X$  below 10 K;  $U_c(X)=0.03 X$  in temperature range (10 to 40) K;  $U_c(X)=0.02 X$  in temperature range (40 to 260) K;  $U_c(X)=0.01 X$  in temperature range (260 to 350) K;  $U_c(X)=0.02 X$  in temperature range (350 to 430) K, where  $X$  represents the heat capacity or the thermodynamic property. Values are reported with one digit more than is justified by the experimental uncertainty to avoid round-off errors in calculations based on these results.

<sup>c</sup> Extrapolated values.

**Table S8.** Standard thermodynamic functions of L-phenylalanine in the crystal state<sup>a</sup> at  $p = 0.1$  MPa.<sup>b</sup>

| $T / \text{K}$  | $C_{pm}^{\circ} / \text{J} \cdot \text{K}^{-1} \cdot \text{mol}^{-1}$ | $S_{\text{m}}^{\circ} / \text{J} \cdot \text{K}^{-1} \cdot \text{mol}^{-1}$ | $\Delta_0^T H_{\text{m}}^{\circ} / \text{kJ} \cdot \text{mol}^{-1}$ | $\Delta_0^T G_{\text{m}}^{\circ} / \text{kJ} \cdot \text{mol}^{-1}$ |
|-----------------|-----------------------------------------------------------------------|-----------------------------------------------------------------------------|---------------------------------------------------------------------|---------------------------------------------------------------------|
| 1 <sup>c</sup>  | 4.412E-03                                                             | 1.490E-03                                                                   | 1.115E-06                                                           | -3.756E-07                                                          |
| 2 <sup>c</sup>  | 3.346E-02                                                             | 1.146E-02                                                                   | 1.709E-05                                                           | -5.822E-06                                                          |
| 3 <sup>c</sup>  | 1.069E-01                                                             | 3.714E-02                                                                   | 8.288E-05                                                           | -2.854E-05                                                          |
| 4 <sup>c</sup>  | 2.397E-01                                                             | 8.452E-02                                                                   | 2.507E-04                                                           | -8.735E-05                                                          |
| 5 <sup>c</sup>  | 4.424E-01                                                             | 1.584E-01                                                                   | 5.856E-04                                                           | -2.064E-04                                                          |
| 6 <sup>c</sup>  | 7.220E-01                                                             | 2.626E-01                                                                   | 1.161E-03                                                           | -4.143E-04                                                          |
| 7 <sup>c</sup>  | 1.082                                                                 | 3.999E-01                                                                   | 2.056E-03                                                           | -7.426E-04                                                          |
| 8 <sup>c</sup>  | 1.524                                                                 | 5.723E-01                                                                   | 3.353E-03                                                           | -1.226E-03                                                          |
| 9 <sup>c</sup>  | 2.046                                                                 | 7.812E-01                                                                   | 5.131E-03                                                           | -1.899E-03                                                          |
| 10 <sup>c</sup> | 2.647                                                                 | 1.027                                                                       | 7.471E-03                                                           | -2.800E-03                                                          |
| 11              | 3.321                                                                 | 1.311                                                                       | 1.045E-02                                                           | -3.966E-03                                                          |
| 12              | 4.064                                                                 | 1.631                                                                       | 1.414E-02                                                           | -5.434E-03                                                          |
| 13              | 4.871                                                                 | 1.988                                                                       | 1.860E-02                                                           | -7.240E-03                                                          |
| 14              | 5.736                                                                 | 2.380                                                                       | 2.390E-02                                                           | -9.421E-03                                                          |
| 15              | 6.652                                                                 | 2.807                                                                       | 3.009E-02                                                           | -1.201E-02                                                          |
| 16              | 7.613                                                                 | 3.266                                                                       | 3.722E-02                                                           | -1.505E-02                                                          |
| 17              | 8.615                                                                 | 3.758                                                                       | 4.533E-02                                                           | -1.856E-02                                                          |
| 18              | 9.650                                                                 | 4.279                                                                       | 5.446E-02                                                           | -2.257E-02                                                          |
| 19              | 10.71                                                                 | 4.830                                                                       | 6.464E-02                                                           | -2.712E-02                                                          |
| 20              | 11.80                                                                 | 5.407                                                                       | 7.589E-02                                                           | -3.224E-02                                                          |
| 25              | 17.46                                                                 | 8.643                                                                       | 1.489E-01                                                           | -6.714E-02                                                          |
| 30              | 23.21                                                                 | 12.34                                                                       | 2.506E-01                                                           | -1.194E-01                                                          |
| 35              | 28.88                                                                 | 16.34                                                                       | 3.809E-01                                                           | -1.910E-01                                                          |
| 40              | 34.33                                                                 | 20.56                                                                       | 5.390E-01                                                           | -2.832E-01                                                          |
| 45              | 39.49                                                                 | 24.90                                                                       | 7.237E-01                                                           | -3.968E-01                                                          |
| 50              | 44.36                                                                 | 29.31                                                                       | 9.334E-01                                                           | -5.323E-01                                                          |
| 55              | 48.91                                                                 | 33.76                                                                       | 1.167                                                               | -6.900E-01                                                          |
| 60              | 53.18                                                                 | 38.20                                                                       | 1.422                                                               | -8.699E-01                                                          |
| 65              | 57.19                                                                 | 42.62                                                                       | 1.698                                                               | -1.072                                                              |
| 70              | 60.96                                                                 | 46.99                                                                       | 1.994                                                               | -1.296                                                              |
| 75              | 64.54                                                                 | 51.32                                                                       | 2.307                                                               | -1.542                                                              |
| 80              | 67.95                                                                 | 55.60                                                                       | 2.639                                                               | -1.809                                                              |
| 85              | 71.22                                                                 | 59.82                                                                       | 2.987                                                               | -2.098                                                              |
| 90              | 74.38                                                                 | 63.98                                                                       | 3.351                                                               | -2.407                                                              |
| 95              | 77.47                                                                 | 68.08                                                                       | 3.730                                                               | -2.737                                                              |
| 100             | 80.50                                                                 | 72.13                                                                       | 4.125                                                               | -3.088                                                              |
| 110             | 86.50                                                                 | 80.09                                                                       | 4.960                                                               | -3.849                                                              |
| 120             | 92.44                                                                 | 87.87                                                                       | 5.855                                                               | -4.689                                                              |
| 130             | 98.36                                                                 | 95.50                                                                       | 6.809                                                               | -5.606                                                              |
| 140             | 104.3                                                                 | 103.0                                                                       | 7.822                                                               | -6.599                                                              |
| 150             | 110.2                                                                 | 110.4                                                                       | 8.895                                                               | -7.666                                                              |
| 160             | 116.2                                                                 | 117.7                                                                       | 10.03                                                               | -8.806                                                              |
| 170             | 122.2                                                                 | 124.9                                                                       | 11.22                                                               | -10.02                                                              |
| 180             | 128.2                                                                 | 132.1                                                                       | 12.47                                                               | -11.31                                                              |
| 190             | 134.3                                                                 | 139.2                                                                       | 13.78                                                               | -12.66                                                              |
| 200             | 140.3                                                                 | 146.2                                                                       | 15.16                                                               | -14.09                                                              |
| 210             | 146.5                                                                 | 153.2                                                                       | 16.59                                                               | -15.59                                                              |

| $T / \text{K}$ | $C_{pm}^o / \text{J}\cdot\text{K}^{-1}\cdot\text{mol}^{-1}$ | $S_m^o / \text{J}\cdot\text{K}^{-1}\cdot\text{mol}^{-1}$ | $\Delta_0^T H_m^o / \text{kJ}\cdot\text{mol}^{-1}$ | $\Delta_0^T G_m^o / \text{kJ}\cdot\text{mol}^{-1}$ |
|----------------|-------------------------------------------------------------|----------------------------------------------------------|----------------------------------------------------|----------------------------------------------------|
| 220            | 152.6                                                       | 160.2                                                    | 18.08                                              | -17.15                                             |
| 230            | 158.8                                                       | 167.1                                                    | 19.64                                              | -18.79                                             |
| 240            | 165.0                                                       | 174.0                                                    | 21.26                                              | -20.49                                             |
| 250            | 171.2                                                       | 180.8                                                    | 22.94                                              | -22.27                                             |
| 260            | 177.5                                                       | 187.7                                                    | 24.68                                              | -24.11                                             |
| 270            | 183.8                                                       | 194.5                                                    | 26.49                                              | -26.02                                             |
| 273.15         | 185.8                                                       | 196.6                                                    | 27.07                                              | -26.64                                             |
| 280            | 190.2                                                       | 201.3                                                    | 28.36                                              | -28.00                                             |
| 290            | 196.5                                                       | 208.1                                                    | 30.29                                              | -30.05                                             |
| 298.15         | 201.7                                                       | 213.6                                                    | 31.92                                              | -31.77                                             |
| 300            | 202.9                                                       | 214.8                                                    | 32.29                                              | -32.16                                             |
| 310            | 209.3                                                       | 221.6                                                    | 34.35                                              | -34.34                                             |
| 320            | 215.8                                                       | 228.4                                                    | 36.48                                              | -36.59                                             |
| 330            | 222.2                                                       | 235.1                                                    | 38.67                                              | -38.91                                             |
| 340            | 228.6                                                       | 241.8                                                    | 40.92                                              | -41.30                                             |
| 350            | 235.0                                                       | 248.5                                                    | 43.24                                              | -43.75                                             |
| 360            | 241.4                                                       | 255.2                                                    | 45.62                                              | -46.27                                             |
| 370            | 247.8                                                       | 261.9                                                    | 48.07                                              | -48.85                                             |
| 380            | 254.1                                                       | 268.6                                                    | 50.58                                              | -51.50                                             |
| 390            | 260.4                                                       | 275.3                                                    | 53.15                                              | -54.22                                             |
| 400            | 266.6                                                       | 282.0                                                    | 55.79                                              | -57.01                                             |
| 410            | 272.8                                                       | 288.7                                                    | 58.48                                              | -59.86                                             |
| 420            | 278.8                                                       | 295.3                                                    | 61.24                                              | -62.78                                             |

<sup>a</sup> Crystal structure deposited in the Cambridge Structural Database with refcode QQQAUJ05 (see the section 3.2 and Table 3 in the main article).

<sup>b</sup> The combined expanded uncertainty of heat capacity  $U_c(C_{pm})$  as well as of all calculated thermodynamic values (with 0.95 level of confidence,  $k=2$ ) is:  $U_c(X)=0.1 X$  below 10 K;  $U_c(X)=0.03 X$  in temperature range (10 to 40) K;  $U_c(X)=0.02 X$  in temperature range (40 to 260) K;  $U_c(X)=0.01 X$  in temperature range (260 to 350) K;  $U_c(X)=0.02 X$  in temperature range (350 to 430) K, where  $X$  represents the heat capacity or the thermodynamic property. Values are reported with one digit more than is justified by the experimental uncertainty to avoid round-off errors in calculations based on these results.

<sup>c</sup> Extrapolated values.

**Table S9.** Standard thermodynamic functions of L-proline in the crystal state<sup>a</sup> at  $p = 0.1$  MPa.<sup>b</sup>

| $T / \text{K}$  | $C_{pm}^{\circ} / \text{J}\cdot\text{K}^{-1}\cdot\text{mol}^{-1}$ | $S_{\text{m}}^{\circ} / \text{J}\cdot\text{K}^{-1}\cdot\text{mol}^{-1}$ | $\Delta_0^T H_{\text{m}}^{\circ} / \text{kJ}\cdot\text{mol}^{-1}$ | $\Delta_0^T G_{\text{m}}^{\circ} / \text{kJ}\cdot\text{mol}^{-1}$ |
|-----------------|-------------------------------------------------------------------|-------------------------------------------------------------------------|-------------------------------------------------------------------|-------------------------------------------------------------------|
| 1 <sup>c</sup>  | 1.008E-03                                                         | 3.311E-04                                                               | 2.490E-07                                                         | -8.205E-08                                                        |
| 2 <sup>c</sup>  | 8.499E-03                                                         | 2.760E-03                                                               | 4.163E-06                                                         | -1.358E-06                                                        |
| 3 <sup>c</sup>  | 3.006E-02                                                         | 9.673E-03                                                               | 2.193E-05                                                         | -7.094E-06                                                        |
| 4 <sup>c</sup>  | 7.417E-02                                                         | 2.372E-02                                                               | 7.179E-05                                                         | -2.308E-05                                                        |
| 5 <sup>c</sup>  | 1.499E-01                                                         | 4.773E-02                                                               | 1.808E-04                                                         | -5.785E-05                                                        |
| 6 <sup>c</sup>  | 2.662E-01                                                         | 8.465E-02                                                               | 3.851E-04                                                         | -1.228E-04                                                        |
| 7 <sup>c</sup>  | 4.318E-01                                                         | 1.374E-01                                                               | 7.296E-04                                                         | -2.324E-04                                                        |
| 8 <sup>c</sup>  | 6.543E-01                                                         | 2.090E-01                                                               | 1.268E-03                                                         | -4.040E-04                                                        |
| 9 <sup>c</sup>  | 9.401E-01                                                         | 3.019E-01                                                               | 2.059E-03                                                         | -6.575E-04                                                        |
| 10 <sup>c</sup> | 1.294                                                             | 4.186E-01                                                               | 3.171E-03                                                         | -1.016E-03                                                        |
| 11              | 1.718                                                             | 5.613E-01                                                               | 4.671E-03                                                         | -1.503E-03                                                        |
| 12              | 2.214                                                             | 7.315E-01                                                               | 6.631E-03                                                         | -2.147E-03                                                        |
| 13              | 2.780                                                             | 9.306E-01                                                               | 9.122E-03                                                         | -2.976E-03                                                        |
| 14              | 3.413                                                             | 1.159                                                                   | 1.221E-02                                                         | -4.018E-03                                                        |
| 15              | 4.108                                                             | 1.418                                                                   | 1.597E-02                                                         | -5.305E-03                                                        |
| 16              | 4.860                                                             | 1.707                                                                   | 2.045E-02                                                         | -6.865E-03                                                        |
| 17              | 5.663                                                             | 2.026                                                                   | 2.571E-02                                                         | -8.729E-03                                                        |
| 18              | 6.508                                                             | 2.373                                                                   | 3.179E-02                                                         | -1.093E-02                                                        |
| 19              | 7.388                                                             | 2.748                                                                   | 3.873E-02                                                         | -1.348E-02                                                        |
| 20              | 8.297                                                             | 3.150                                                                   | 4.657E-02                                                         | -1.643E-02                                                        |
| 25              | 13.06                                                             | 5.509                                                                   | 9.987E-02                                                         | -3.786E-02                                                        |
| 30              | 17.85                                                             | 8.314                                                                   | 1.772E-01                                                         | -7.226E-02                                                        |
| 35              | 22.58                                                             | 11.42                                                                   | 2.783E-01                                                         | -1.215E-01                                                        |
| 40              | 27.15                                                             | 14.74                                                                   | 4.027E-01                                                         | -1.868E-01                                                        |
| 45              | 31.47                                                             | 18.19                                                                   | 5.493E-01                                                         | -2.691E-01                                                        |
| 50              | 35.50                                                             | 21.71                                                                   | 7.169E-01                                                         | -3.688E-01                                                        |
| 55              | 39.22                                                             | 25.27                                                                   | 9.038E-01                                                         | -4.863E-01                                                        |
| 60              | 42.65                                                             | 28.84                                                                   | 1.109                                                             | -6.216E-01                                                        |
| 65              | 45.82                                                             | 32.38                                                                   | 1.330                                                             | -7.746E-01                                                        |
| 70              | 48.74                                                             | 35.88                                                                   | 1.566                                                             | -9.453E-01                                                        |
| 75              | 51.46                                                             | 39.34                                                                   | 1.817                                                             | -1.133                                                            |
| 80              | 54.02                                                             | 42.74                                                                   | 2.081                                                             | -1.339                                                            |
| 85              | 56.44                                                             | 46.09                                                                   | 2.357                                                             | -1.561                                                            |
| 90              | 58.77                                                             | 49.38                                                                   | 2.645                                                             | -1.799                                                            |
| 95              | 61.02                                                             | 52.62                                                                   | 2.945                                                             | -2.054                                                            |
| 100             | 63.24                                                             | 55.81                                                                   | 3.255                                                             | -2.325                                                            |
| 110             | 67.65                                                             | 62.04                                                                   | 3.910                                                             | -2.915                                                            |
| 120             | 72.04                                                             | 68.11                                                                   | 4.608                                                             | -3.566                                                            |
| 130             | 76.44                                                             | 74.05                                                                   | 5.350                                                             | -4.277                                                            |
| 140             | 80.84                                                             | 79.88                                                                   | 6.137                                                             | -5.046                                                            |
| 150             | 85.26                                                             | 85.61                                                                   | 6.967                                                             | -5.874                                                            |
| 160             | 89.68                                                             | 91.25                                                                   | 7.842                                                             | -6.758                                                            |
| 170             | 94.11                                                             | 96.82                                                                   | 8.761                                                             | -7.699                                                            |
| 180             | 98.53                                                             | 102.3                                                                   | 9.724                                                             | -8.695                                                            |
| 190             | 102.9                                                             | 107.8                                                                   | 10.73                                                             | -9.745                                                            |
| 200             | 107.3                                                             | 113.2                                                                   | 11.78                                                             | -10.85                                                            |
| 210             | 111.6                                                             | 118.5                                                                   | 12.88                                                             | -12.01                                                            |

| $T / \text{K}$ | $C_{pm}^{\circ} / \text{J}\cdot\text{K}^{-1}\cdot\text{mol}^{-1}$ | $S_{\text{m}}^{\circ} / \text{J}\cdot\text{K}^{-1}\cdot\text{mol}^{-1}$ | $\Delta_0^T H_{\text{m}}^{\circ} / \text{kJ}\cdot\text{mol}^{-1}$ | $\Delta_0^T G_{\text{m}}^{\circ} / \text{kJ}\cdot\text{mol}^{-1}$ |
|----------------|-------------------------------------------------------------------|-------------------------------------------------------------------------|-------------------------------------------------------------------|-------------------------------------------------------------------|
| 220            | 116.0                                                             | 123.8                                                                   | 14.02                                                             | -13.22                                                            |
| 230            | 120.2                                                             | 129.0                                                                   | 15.20                                                             | -14.48                                                            |
| 240            | 124.5                                                             | 134.3                                                                   | 16.42                                                             | -15.80                                                            |
| 250            | 128.8                                                             | 139.4                                                                   | 17.69                                                             | -17.17                                                            |
| 260            | 133.2                                                             | 144.6                                                                   | 19.00                                                             | -18.59                                                            |
| 270            | 137.5                                                             | 149.7                                                                   | 20.35                                                             | -20.06                                                            |
| 273.15         | 138.9                                                             | 151.3                                                                   | 20.79                                                             | -20.53                                                            |
| 280            | 141.9                                                             | 154.8                                                                   | 21.75                                                             | -21.58                                                            |
| 290            | 146.4                                                             | 159.8                                                                   | 23.19                                                             | -23.16                                                            |
| 298.15         | 150.1                                                             | 163.9                                                                   | 24.40                                                             | -24.47                                                            |
| 300            | 150.9                                                             | 164.8                                                                   | 24.68                                                             | -24.78                                                            |
| 310            | 155.6                                                             | 169.9                                                                   | 26.21                                                             | -26.45                                                            |
| 320            | 160.3                                                             | 174.9                                                                   | 27.79                                                             | -28.18                                                            |
| 330            | 165.1                                                             | 179.9                                                                   | 29.41                                                             | -29.95                                                            |
| 340            | 170.1                                                             | 184.9                                                                   | 31.09                                                             | -31.77                                                            |
| 350            | 175.1                                                             | 189.9                                                                   | 32.82                                                             | -33.65                                                            |
| 360            | 180.3                                                             | 194.9                                                                   | 34.59                                                             | -35.57                                                            |
| 370            | 185.6                                                             | 199.9                                                                   | 36.42                                                             | -37.55                                                            |
| 380            | 190.7                                                             | 204.9                                                                   | 38.30                                                             | -39.57                                                            |
| 390            | 195.6                                                             | 209.9                                                                   | 40.24                                                             | -41.64                                                            |
| 400            | 200.1                                                             | 215.0                                                                   | 42.21                                                             | -43.77                                                            |
| 410            | 204.1                                                             | 219.9                                                                   | 44.24                                                             | -45.94                                                            |
| 420            | 207.5                                                             | 224.9                                                                   | 46.29                                                             | -48.17                                                            |
| 430            | 210.2                                                             | 229.8                                                                   | 48.38                                                             | -50.44                                                            |

<sup>a</sup> Crystal structure deposited in the Cambridge Structural Database with refcode PROLIN (see the section 3.2 and Table 3 in the main article).

<sup>b</sup> The combined expanded uncertainty of heat capacity  $U_c(C_{pm})$  as well as of all calculated thermodynamic values (with 0.95 level of confidence,  $k=2$ ) is:  $U_c(X)=0.1 X$  below 10 K;  $U_c(X)=0.03 X$  in temperature range (10 to 40) K;  $U_c(X)=0.02 X$  in temperature range (40 to 260) K;  $U_c(X)=0.01 X$  in temperature range (260 to 350) K;  $U_c(X)=0.02 X$  in temperature range (350 to 430) K, where  $X$  represents the heat capacity or the thermodynamic property. Values are reported with one digit more than is justified by the experimental uncertainty to avoid round-off errors in calculations based on these results.

<sup>c</sup> Extrapolated values.

**Table S10.** Standard thermodynamic functions of L-tryptophan in the crystal state<sup>a</sup> at  $p = 0.1$  MPa.<sup>b</sup>

| $T / \text{K}$  | $C_{pm}^{\circ} / \text{J} \cdot \text{K}^{-1} \cdot \text{mol}^{-1}$ | $S_{\text{m}}^{\circ} / \text{J} \cdot \text{K}^{-1} \cdot \text{mol}^{-1}$ | $\Delta_0^T H_{\text{m}}^{\circ} / \text{kJ} \cdot \text{mol}^{-1}$ | $\Delta_0^T G_{\text{m}}^{\circ} / \text{kJ} \cdot \text{mol}^{-1}$ |
|-----------------|-----------------------------------------------------------------------|-----------------------------------------------------------------------------|---------------------------------------------------------------------|---------------------------------------------------------------------|
| 1 <sup>c</sup>  | 1.017E-02                                                             | 3.478E-03                                                                   | 2.595E-06                                                           | -8.829E-07                                                          |
| 2 <sup>c</sup>  | 7.366E-02                                                             | 2.582E-02                                                                   | 3.834E-05                                                           | -1.331E-05                                                          |
| 3 <sup>c</sup>  | 2.255E-01                                                             | 8.101E-02                                                                   | 1.795E-04                                                           | -6.353E-05                                                          |
| 4 <sup>c</sup>  | 4.856E-01                                                             | 1.788E-01                                                                   | 5.255E-04                                                           | -1.896E-04                                                          |
| 5 <sup>c</sup>  | 8.634E-01                                                             | 3.255E-01                                                                   | 1.190E-03                                                           | -4.374E-04                                                          |
| 6 <sup>c</sup>  | 1.361                                                                 | 5.251E-01                                                                   | 2.292E-03                                                           | -8.582E-04                                                          |
| 7 <sup>c</sup>  | 1.974                                                                 | 7.795E-01                                                                   | 3.950E-03                                                           | -1.506E-03                                                          |
| 8 <sup>c</sup>  | 2.697                                                                 | 1.089                                                                       | 6.277E-03                                                           | -2.436E-03                                                          |
| 9 <sup>c</sup>  | 3.521                                                                 | 1.453                                                                       | 9.379E-03                                                           | -3.702E-03                                                          |
| 10 <sup>c</sup> | 4.436                                                                 | 1.871                                                                       | 1.335E-02                                                           | -5.360E-03                                                          |
| 11 <sup>c</sup> | 5.431                                                                 | 2.340                                                                       | 1.828E-02                                                           | -7.461E-03                                                          |
| 12              | 6.496                                                                 | 2.858                                                                       | 2.424E-02                                                           | -1.006E-02                                                          |
| 13              | 7.621                                                                 | 3.422                                                                       | 3.129E-02                                                           | -1.319E-02                                                          |
| 14              | 8.796                                                                 | 4.029                                                                       | 3.949E-02                                                           | -1.691E-02                                                          |
| 15              | 10.01                                                                 | 4.677                                                                       | 4.889E-02                                                           | -2.126E-02                                                          |
| 16              | 11.26                                                                 | 5.363                                                                       | 5.953E-02                                                           | -2.628E-02                                                          |
| 17              | 12.54                                                                 | 6.084                                                                       | 7.143E-02                                                           | -3.200E-02                                                          |
| 18              | 13.83                                                                 | 6.837                                                                       | 8.461E-02                                                           | -3.846E-02                                                          |
| 19              | 15.14                                                                 | 7.620                                                                       | 9.909E-02                                                           | -4.569E-02                                                          |
| 20              | 16.46                                                                 | 8.430                                                                       | 1.149E-01                                                           | -5.371E-02                                                          |
| 25              | 23.02                                                                 | 12.81                                                                       | 2.136E-01                                                           | -1.066E-01                                                          |
| 30              | 29.33                                                                 | 17.57                                                                       | 3.446E-01                                                           | -1.824E-01                                                          |
| 35              | 35.26                                                                 | 22.54                                                                       | 5.063E-01                                                           | -2.826E-01                                                          |
| 40              | 40.81                                                                 | 27.61                                                                       | 6.966E-01                                                           | -4.080E-01                                                          |
| 45              | 46.06                                                                 | 32.73                                                                       | 9.139E-01                                                           | -5.589E-01                                                          |
| 50              | 51.04                                                                 | 37.84                                                                       | 1.157                                                               | -7.353E-01                                                          |
| 55              | 55.78                                                                 | 42.93                                                                       | 1.424                                                               | -9.372E-01                                                          |
| 60              | 60.31                                                                 | 47.98                                                                       | 1.714                                                               | -1.165                                                              |
| 65              | 64.65                                                                 | 52.98                                                                       | 2.027                                                               | -1.417                                                              |
| 70              | 68.84                                                                 | 57.92                                                                       | 2.360                                                               | -1.694                                                              |
| 75              | 72.89                                                                 | 62.81                                                                       | 2.715                                                               | -1.996                                                              |
| 80              | 76.82                                                                 | 67.64                                                                       | 3.089                                                               | -2.322                                                              |
| 85              | 80.67                                                                 | 72.41                                                                       | 3.483                                                               | -2.672                                                              |
| 90              | 84.43                                                                 | 77.13                                                                       | 3.896                                                               | -3.046                                                              |
| 95              | 88.14                                                                 | 81.80                                                                       | 4.327                                                               | -3.444                                                              |
| 100             | 91.80                                                                 | 86.41                                                                       | 4.777                                                               | -3.864                                                              |
| 110             | 99.01                                                                 | 95.50                                                                       | 5.731                                                               | -4.774                                                              |
| 120             | 106.2                                                                 | 104.4                                                                       | 6.757                                                               | -5.774                                                              |
| 130             | 113.2                                                                 | 113.2                                                                       | 7.854                                                               | -6.862                                                              |
| 140             | 120.3                                                                 | 121.9                                                                       | 9.022                                                               | -8.037                                                              |
| 150             | 127.4                                                                 | 130.4                                                                       | 10.26                                                               | -9.298                                                              |
| 160             | 134.5                                                                 | 138.8                                                                       | 11.57                                                               | -10.65                                                              |
| 170             | 141.7                                                                 | 147.2                                                                       | 12.95                                                               | -12.08                                                              |
| 180             | 148.9                                                                 | 155.5                                                                       | 14.40                                                               | -13.59                                                              |
| 190             | 156.2                                                                 | 163.8                                                                       | 15.93                                                               | -15.19                                                              |
| 200             | 163.5                                                                 | 172.0                                                                       | 17.53                                                               | -16.86                                                              |
| 210             | 170.9                                                                 | 180.1                                                                       | 19.20                                                               | -18.62                                                              |



| $T / \text{K}$ | $C_{pm}^o / \text{J}\cdot\text{K}^{-1}\cdot\text{mol}^{-1}$ | $S_m^o / \text{J}\cdot\text{K}^{-1}\cdot\text{mol}^{-1}$ | $\Delta_0^T H_m^o / \text{kJ}\cdot\text{mol}^{-1}$ | $\Delta_0^T G_m^o / \text{kJ}\cdot\text{mol}^{-1}$ |
|----------------|-------------------------------------------------------------|----------------------------------------------------------|----------------------------------------------------|----------------------------------------------------|
| 220            | 178.3                                                       | 188.2                                                    | 20.95                                              | -20.47                                             |
| 230            | 185.8                                                       | 196.3                                                    | 22.77                                              | -22.39                                             |
| 240            | 193.3                                                       | 204.4                                                    | 24.66                                              | -24.39                                             |
| 250            | 200.9                                                       | 212.4                                                    | 26.63                                              | -26.48                                             |
| 260            | 208.5                                                       | 220.5                                                    | 28.68                                              | -28.64                                             |
| 270            | 216.1                                                       | 228.5                                                    | 30.80                                              | -30.89                                             |
| 273.15         | 218.5                                                       | 231.0                                                    | 31.49                                              | -31.61                                             |
| 280            | 223.7                                                       | 236.5                                                    | 33.00                                              | -33.21                                             |
| 290            | 231.4                                                       | 244.5                                                    | 35.28                                              | -35.61                                             |
| 298.15         | 237.6                                                       | 250.9                                                    | 37.19                                              | -37.63                                             |
| 300            | 239.0                                                       | 252.4                                                    | 37.63                                              | -38.10                                             |
| 310            | 246.6                                                       | 260.4                                                    | 40.06                                              | -40.66                                             |
| 320            | 254.1                                                       | 268.3                                                    | 42.56                                              | -43.31                                             |
| 330            | 261.6                                                       | 276.3                                                    | 45.14                                              | -46.03                                             |
| 340            | 269.1                                                       | 284.2                                                    | 47.79                                              | -48.83                                             |
| 350            | 276.4                                                       | 292.1                                                    | 50.52                                              | -51.71                                             |
| 360            | 283.6                                                       | 300.0                                                    | 53.32                                              | -54.67                                             |
| 370            | 290.7                                                       | 307.8                                                    | 56.19                                              | -57.71                                             |
| 380            | 297.6                                                       | 315.7                                                    | 59.13                                              | -60.83                                             |
| 390            | 304.3                                                       | 323.5                                                    | 62.14                                              | -64.03                                             |
| 400            | 310.9                                                       | 331.3                                                    | 65.22                                              | -67.30                                             |
| 410            | 317.2                                                       | 339.1                                                    | 68.36                                              | -70.65                                             |
| 420            | 323.3                                                       | 346.8                                                    | 71.56                                              | -74.08                                             |
| 430            | 329.1                                                       | 354.4                                                    | 74.82                                              | -77.59                                             |

<sup>a</sup> Crystal structure deposited in the Cambridge Structural Database with refcode VIXQOK (see the section 3.2 and Table 3 in the main article).

<sup>b</sup> The combined expanded uncertainty of heat capacity  $U_c(C_{pm})$  as well as of all calculated thermodynamic values (with 0.95 level of confidence,  $k=2$ ) is:  $U_c(X)=0.1 X$  below 10 K;  $U_c(X)=0.03 X$  in temperature range (10 to 40) K;  $U_c(X)=0.02 X$  in temperature range (40 to 260) K;  $U_c(X)=0.01 X$  in temperature range (260 to 350) K;  $U_c(X)=0.02 X$  in temperature range (350 to 430) K, where  $X$  represents the heat capacity or the thermodynamic property. Values are reported with one digit more than is justified by the experimental uncertainty to avoid round-off errors in calculations based on these results.

<sup>c</sup> Extrapolated values.

**Table S11.** Standard thermodynamic functions of L-tyrosine in the crystal state<sup>a</sup> at  $p = 0.1$  MPa.<sup>b</sup>

| $T / \text{K}$  | $C_{pm}^{\circ} / \text{J} \cdot \text{K}^{-1} \cdot \text{mol}^{-1}$ | $S_{\text{m}}^{\circ} / \text{J} \cdot \text{K}^{-1} \cdot \text{mol}^{-1}$ | $\Delta_0^T H_{\text{m}}^{\circ} / \text{kJ} \cdot \text{mol}^{-1}$ | $\Delta_0^T G_{\text{m}}^{\circ} / \text{kJ} \cdot \text{mol}^{-1}$ |
|-----------------|-----------------------------------------------------------------------|-----------------------------------------------------------------------------|---------------------------------------------------------------------|---------------------------------------------------------------------|
| 1 <sup>c</sup>  | 2.372E-03                                                             | 8.070E-04                                                                   | 6.028E-07                                                           | -2.043E-07                                                          |
| 2 <sup>c</sup>  | 1.758E-02                                                             | 6.090E-03                                                                   | 9.063E-06                                                           | -3.117E-06                                                          |
| 3 <sup>c</sup>  | 5.530E-02                                                             | 1.946E-02                                                                   | 4.330E-05                                                           | -1.509E-05                                                          |
| 4 <sup>c</sup>  | 1.228E-01                                                             | 4.383E-02                                                                   | 1.296E-04                                                           | -4.571E-05                                                          |
| 5 <sup>c</sup>  | 2.256E-01                                                             | 8.157E-02                                                                   | 3.007E-04                                                           | -1.072E-04                                                          |
| 6 <sup>c</sup>  | 3.684E-01                                                             | 1.347E-01                                                                   | 5.942E-04                                                           | -2.140E-04                                                          |
| 7 <sup>c</sup>  | 5.548E-01                                                             | 2.049E-01                                                                   | 1.052E-03                                                           | -3.823E-04                                                          |
| 8 <sup>c</sup>  | 7.879E-01                                                             | 2.937E-01                                                                   | 1.719E-03                                                           | -6.300E-04                                                          |
| 9 <sup>c</sup>  | 1.070                                                                 | 4.023E-01                                                                   | 2.644E-03                                                           | -9.763E-04                                                          |
| 10 <sup>c</sup> | 1.404                                                                 | 5.319E-01                                                                   | 3.877E-03                                                           | -1.442E-03                                                          |
| 11              | 1.792                                                                 | 6.835E-01                                                                   | 5.471E-03                                                           | -2.047E-03                                                          |
| 12              | 2.234                                                                 | 8.580E-01                                                                   | 7.479E-03                                                           | -2.816E-03                                                          |
| 13              | 2.732                                                                 | 1.056                                                                       | 9.958E-03                                                           | -3.771E-03                                                          |
| 14              | 3.286                                                                 | 1.278                                                                       | 1.296E-02                                                           | -4.936E-03                                                          |
| 15              | 3.896                                                                 | 1.526                                                                       | 1.655E-02                                                           | -6.336E-03                                                          |
| 16              | 4.561                                                                 | 1.798                                                                       | 2.077E-02                                                           | -7.996E-03                                                          |
| 17              | 5.280                                                                 | 2.096                                                                       | 2.569E-02                                                           | -9.941E-03                                                          |
| 18              | 6.050                                                                 | 2.419                                                                       | 3.135E-02                                                           | -1.220E-02                                                          |
| 19              | 6.870                                                                 | 2.768                                                                       | 3.780E-02                                                           | -1.479E-02                                                          |
| 20              | 7.734                                                                 | 3.142                                                                       | 4.510E-02                                                           | -1.774E-02                                                          |
| 25              | 12.60                                                                 | 5.376                                                                       | 9.561E-02                                                           | -3.879E-02                                                          |
| 30              | 18.09                                                                 | 8.152                                                                       | 1.722E-01                                                           | -7.240E-02                                                          |
| 35              | 23.83                                                                 | 11.37                                                                       | 2.769E-01                                                           | -1.211E-01                                                          |
| 40              | 29.57                                                                 | 14.93                                                                       | 4.104E-01                                                           | -1.867E-01                                                          |
| 45              | 35.15                                                                 | 18.73                                                                       | 5.723E-01                                                           | -2.707E-01                                                          |
| 50              | 40.50                                                                 | 22.72                                                                       | 7.615E-01                                                           | -3.743E-01                                                          |
| 55              | 45.60                                                                 | 26.82                                                                       | 9.768E-01                                                           | -4.981E-01                                                          |
| 60              | 50.44                                                                 | 30.99                                                                       | 1.217                                                               | -6.426E-01                                                          |
| 65              | 55.03                                                                 | 35.22                                                                       | 1.481                                                               | -8.081E-01                                                          |
| 70              | 59.37                                                                 | 39.45                                                                       | 1.767                                                               | -9.948E-01                                                          |
| 75              | 63.49                                                                 | 43.69                                                                       | 2.074                                                               | -1.203                                                              |
| 80              | 67.41                                                                 | 47.91                                                                       | 2.402                                                               | -1.432                                                              |
| 85              | 71.17                                                                 | 52.11                                                                       | 2.748                                                               | -1.682                                                              |
| 90              | 74.80                                                                 | 56.29                                                                       | 3.113                                                               | -1.953                                                              |
| 95              | 78.33                                                                 | 60.42                                                                       | 3.496                                                               | -2.245                                                              |
| 100             | 81.79                                                                 | 64.53                                                                       | 3.896                                                               | -2.557                                                              |
| 110             | 88.64                                                                 | 72.65                                                                       | 4.748                                                               | -3.243                                                              |
| 120             | 95.41                                                                 | 80.65                                                                       | 5.669                                                               | -4.010                                                              |
| 130             | 102.1                                                                 | 88.56                                                                       | 6.657                                                               | -4.856                                                              |
| 140             | 108.9                                                                 | 96.37                                                                       | 7.712                                                               | -5.780                                                              |
| 150             | 115.6                                                                 | 104.1                                                                       | 8.834                                                               | -6.783                                                              |
| 160             | 122.3                                                                 | 111.8                                                                       | 10.02                                                               | -7.862                                                              |
| 170             | 129.0                                                                 | 119.4                                                                       | 11.28                                                               | -9.018                                                              |
| 180             | 135.7                                                                 | 127.0                                                                       | 12.60                                                               | -10.25                                                              |
| 190             | 142.4                                                                 | 134.5                                                                       | 13.99                                                               | -11.56                                                              |
| 200             | 149.1                                                                 | 142.0                                                                       | 15.45                                                               | -12.94                                                              |
| 210             | 155.8                                                                 | 149.4                                                                       | 16.98                                                               | -14.40                                                              |

| $T / \text{K}$ | $C_{pm}^{\circ} / \text{J} \cdot \text{K}^{-1} \cdot \text{mol}^{-1}$ | $S_{\text{m}}^{\circ} / \text{J} \cdot \text{K}^{-1} \cdot \text{mol}^{-1}$ | $\Delta_0^T H_{\text{m}}^{\circ} / \text{kJ} \cdot \text{mol}^{-1}$ | $\Delta_0^T G_{\text{m}}^{\circ} / \text{kJ} \cdot \text{mol}^{-1}$ |
|----------------|-----------------------------------------------------------------------|-----------------------------------------------------------------------------|---------------------------------------------------------------------|---------------------------------------------------------------------|
| 220            | 162.5                                                                 | 156.8                                                                       | 18.57                                                               | -15.93                                                              |
| 230            | 169.2                                                                 | 164.2                                                                       | 20.23                                                               | -17.53                                                              |
| 240            | 176.0                                                                 | 171.5                                                                       | 21.95                                                               | -19.21                                                              |
| 250            | 182.7                                                                 | 178.8                                                                       | 23.75                                                               | -20.96                                                              |
| 260            | 189.4                                                                 | 186.1                                                                       | 25.61                                                               | -22.79                                                              |
| 270            | 196.2                                                                 | 193.4                                                                       | 27.53                                                               | -24.68                                                              |
| 273.15         | 198.4                                                                 | 195.7                                                                       | 28.16                                                               | -25.30                                                              |
| 280            | 203.0                                                                 | 200.7                                                                       | 29.53                                                               | -26.66                                                              |
| 290            | 209.9                                                                 | 207.9                                                                       | 31.59                                                               | -28.70                                                              |
| 298.15         | 215.5                                                                 | 213.8                                                                       | 33.33                                                               | -30.42                                                              |
| 300            | 216.8                                                                 | 215.1                                                                       | 33.73                                                               | -30.81                                                              |
| 310            | 223.7                                                                 | 222.4                                                                       | 35.93                                                               | -33.00                                                              |
| 320            | 230.6                                                                 | 229.6                                                                       | 38.20                                                               | -35.26                                                              |
| 330            | 237.6                                                                 | 236.8                                                                       | 40.54                                                               | -37.59                                                              |
| 340            | 244.6                                                                 | 244.0                                                                       | 42.95                                                               | -40.00                                                              |
| 350            | 251.7                                                                 | 251.2                                                                       | 45.43                                                               | -42.47                                                              |
| 360            | 258.8                                                                 | 258.4                                                                       | 47.99                                                               | -45.02                                                              |
| 370            | 265.9                                                                 | 265.5                                                                       | 50.61                                                               | -47.64                                                              |
| 380            | 273.1                                                                 | 272.7                                                                       | 53.31                                                               | -50.33                                                              |
| 390            | 280.3                                                                 | 279.9                                                                       | 56.07                                                               | -53.09                                                              |
| 400            | 287.5                                                                 | 287.1                                                                       | 58.91                                                               | -55.93                                                              |
| 410            | 294.7                                                                 | 294.3                                                                       | 61.82                                                               | -58.83                                                              |
| 420            | 302.0                                                                 | 301.5                                                                       | 64.81                                                               | -61.81                                                              |
| 430            | 309.3                                                                 | 308.7                                                                       | 67.86                                                               | -64.86                                                              |

<sup>a</sup> Crystal structure deposited in the Cambridge Structural Database with refcode LTYROS11 (see the section 3.2 and Table 3 in the main article).

<sup>b</sup> The combined expanded uncertainty of heat capacity  $U_c(C_{pm})$  as well as of all calculated thermodynamic values (with 0.95 level of confidence,  $k=2$ ) is:  $U_c(X)=0.1 X$  below 10 K;  $U_c(X)=0.03 X$  in temperature range (10 to 40) K;  $U_c(X)=0.02 X$  in temperature range (40 to 260) K;  $U_c(X)=0.01 X$  in temperature range (260 to 350) K;  $U_c(X)=0.02 X$  in temperature range (350 to 430) K, where  $X$  represents the heat capacity or the thermodynamic property. Values are reported with one digit more than is justified by the experimental uncertainty to avoid round-off errors in calculations based on these results.

<sup>c</sup> Extrapolated values.
